# Supplementary material for: Stitching the synapse: Cross-linking mass spectrometry into resolving synaptic protein interactions
Source: PubMed Central journal article supplement (PMC7030922; doi:10.1126/sciadv.aax5783), 2020-02-19
Supplement: aax5783_SM.pdf [file aax5783_SM.pdf]

## Supplementary Materials for

### Stitching the synapse: Cross-linking mass spectrometry into resolving synaptic protein interactions

M. A. Gonzalez-Lozano, F. Koopmans, P. F. Sullivan, J. Protze, G. Krause, M. Verhage, K. W. Li\*, F. Liu\*, A. B. Smit\*

\*Corresponding author. Email: k.w.li@vu.nl (K.W.L.); fliu@fmp-berlin.de (F.L.); guus.smit@vu.nl (A.B.S.)

Published 19 February 2020, *Sci. Adv.* **6**, eaax5783 (2020)

DOI: 10.1126/sciadv.aax5783

#### The PDF file includes:

Fig. S1. General evaluation of the XL-MS approach.

Fig. S2. Mapping of cross-linking data onto high-resolution structure of several protein complexes.

Fig. S3. Characterization of XL-based protein interaction network from hippocampus synaptosomes.

Fig. S4. Characterization of XL-based protein interaction network from hippocampus microsomes.

Fig. S5. Characterization of XL-based protein interaction network from cerebellum synaptosomes.

Fig. S6. Characterization of XL-based protein interaction network from cerebellum microsomes.

Fig. S7. Extended and detailed XL-based protein interaction network (extended Fig. 3A).

Fig. S8. XL-based protein interaction network analysis.

Fig. S9. Protein interaction interfaces and peptide array analysis (extended Fig. 4).

Fig. S10. Evaluation of XL-MS approach on biologically independent replicates for hippocampal synaptosome (extended Fig. 6).

Fig. S11. Complete XL-based protein interaction network from all seven cross-linking MS experiments.

#### Other Supplementary Material for this manuscript includes the following:

(available at [advances.sciencemag.org/cgi/content/full/6/8/eaax5783/DC1](https://advances.sciencemag.org/cgi/content/full/6/8/eaax5783/DC1))

Table S1A (Microsoft Excel format). Complete list of cross-links identified in the two datasets.

Table S1B (Microsoft Excel format). SynGO enrichment analysis of proteins identified in dataset 1.

Table S1C (Microsoft Excel format). Cross-linked protein list.

Table S2 (Microsoft Excel format). Clustering and GO enrichment analysis of the proteins in the XL-based protein interaction network.

Table S3 (Microsoft Excel format). Human protein mapping and overlap of cross-linked lysine positions with protein interaction interfaces.

Table S4 (Microsoft Excel format). Sequences and signal intensities for the peptides included in the two independent replicates of peptide arrays (fig. S9B).

Movie S1 (.mp4 format). Dynamic simulation of the three conformational states of Camk2.

## Supplementary figures

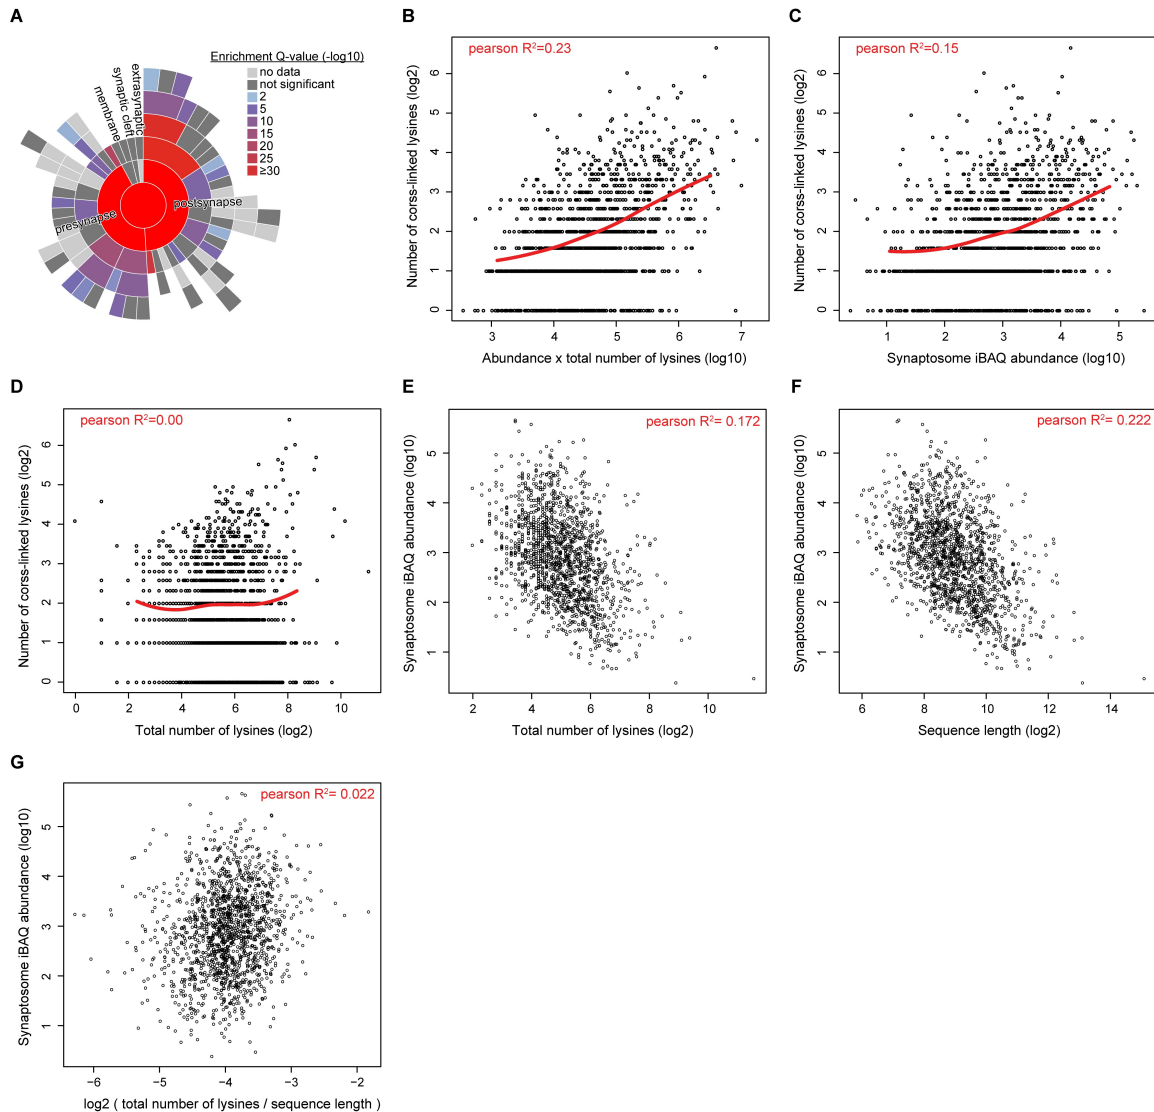

**Fig. S1. General evaluation of the XL-MS approach.** (A) Sunburst plot showing the annotation in synaptic functions of the cross-linked proteins identified (cellular component SynGO terms (11)). Inner rings are parent terms of more specific child terms in outer rings, color-coded according to enrichment Q-value. Notably, a wide and significant coverage of synapse-specific proteins is found distributed across both pre- and post-synapse locations. (B) Correlation between the number of cross-linked lysines of each protein and the protein abundance corrected for the total number of lysines, (C) the protein abundance, and (D) the total number of lysines. (E-G) Correlation between the protein abundance of each protein and the total number of lysines or sequence length.

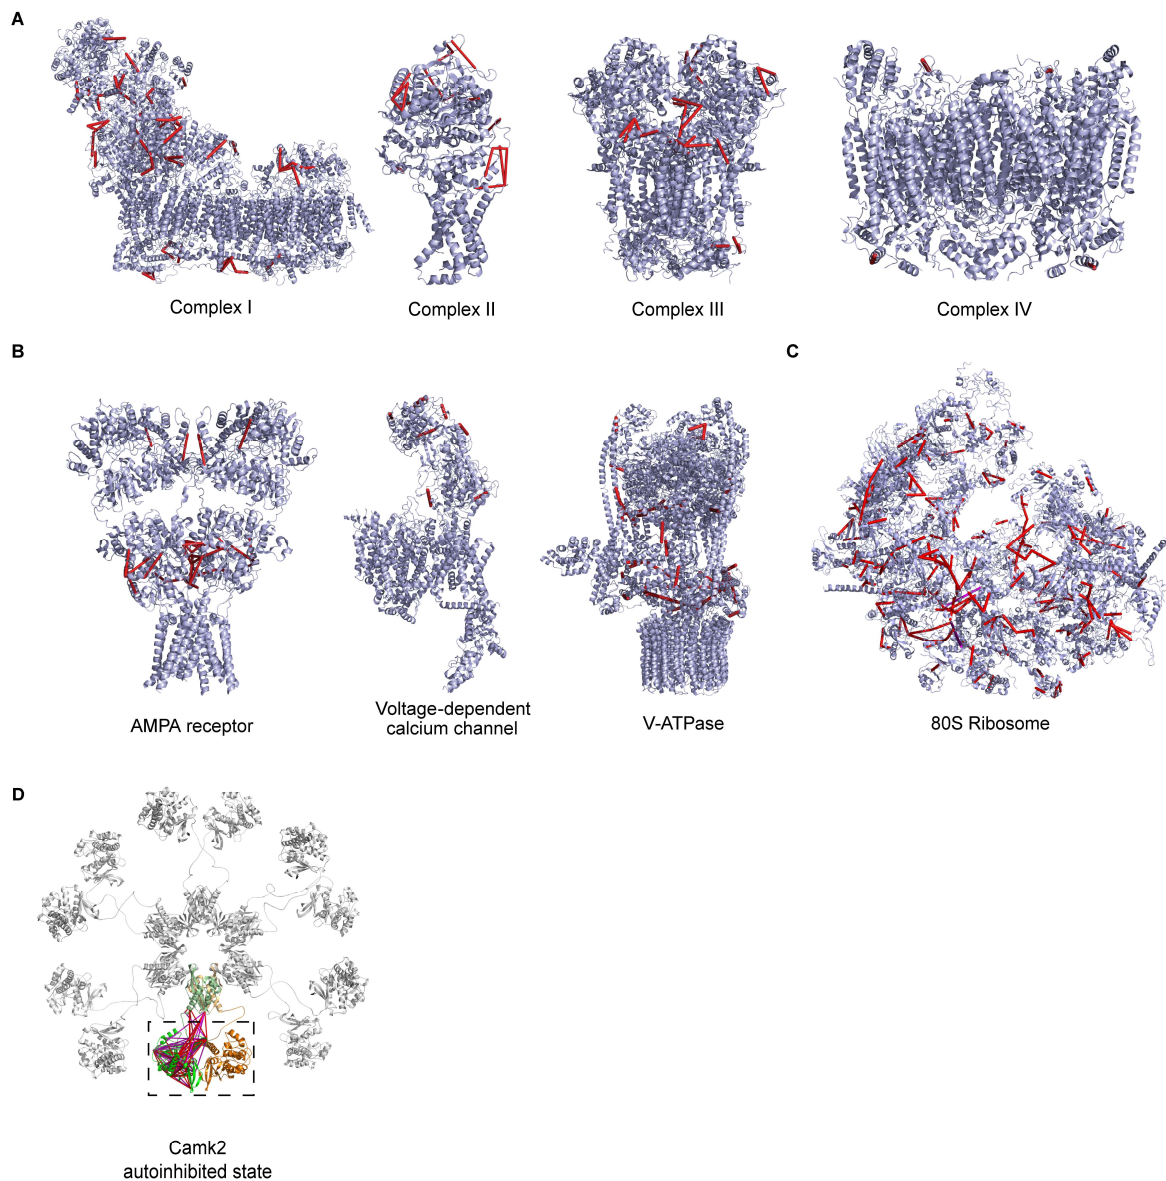

**Fig. S2. Mapping of cross-linking data onto high-resolution structure of several protein complexes.** (A) Cross-link mapping of the mitochondrial electron transport chain (ETC) complexes I-IV (PDB 5LNL, 1ZOY, 1NTM and 1V54). (B) Cross-link mapping of three selected synaptic protein complexes: the AMPA receptor (PDB 3KG2), voltage-dependent calcium channel (VDCC, PDB 5GJV), and vacuolar-type ATPase (V-ATPase, PDB 3J9V). (C) Cross-link mapping of the 80S ribosome (PDB 4UG0). For clarity, nucleic acids are not shown. (D) Full length model of an auto-inhibited state of Camk2 with high-resolution structure of the auto-inhibited kinase dimer (dotted rectangle, PDB 2BDW). Cross-links are represented as the Euclidean distance between the C $\alpha$  of the cross-linked residues, and indicated in red (if below DSSO maximal distance restraint) or in magenta (if exceeding DSSO maximal distance restraint).



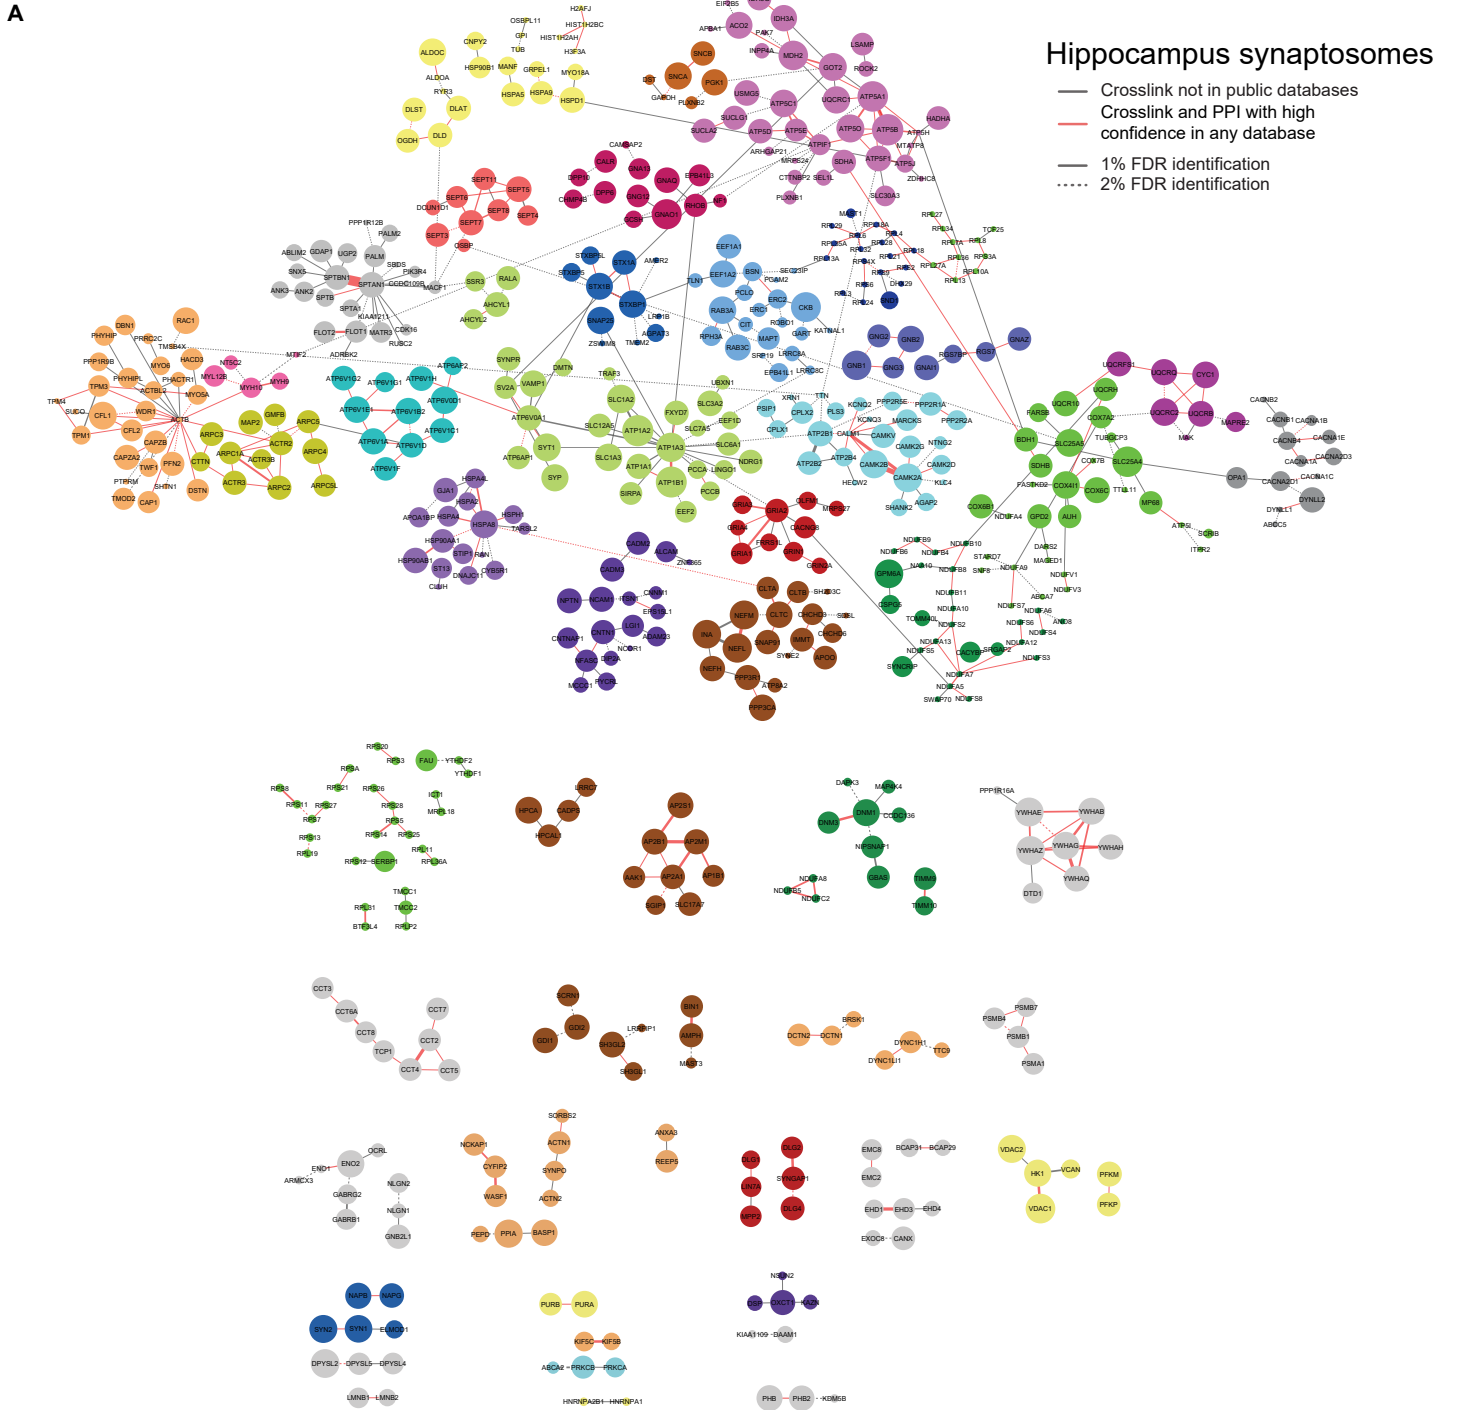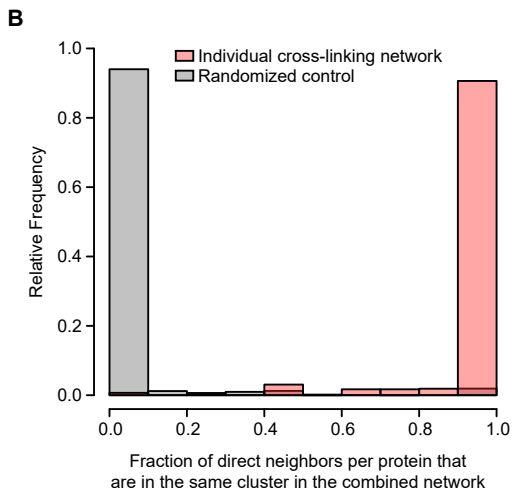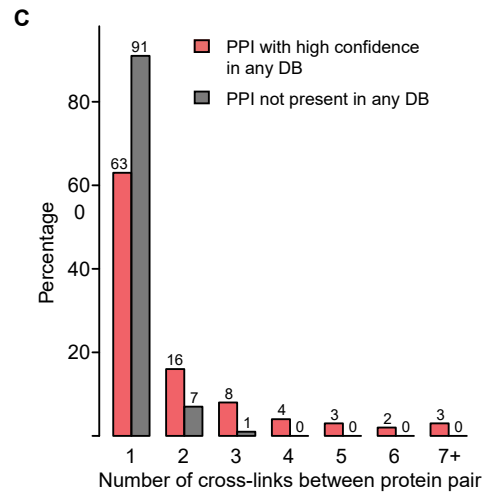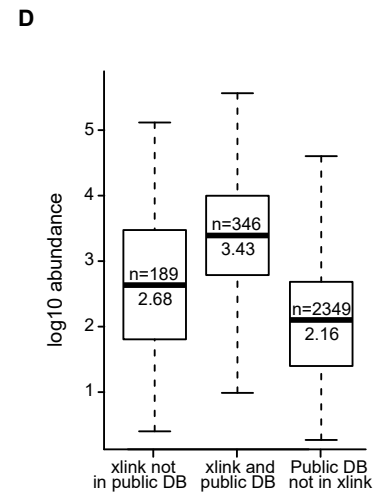

**Fig. S3. Characterization of XL-based protein interaction network from hippocampus**

**synaptosomes. (A)** Nodes represent proteins and edges show the interactions identified by a single XL-MS experiment in hippocampal synaptosomes (dataset 1). Protein names are included and disconnected protein modules with at least 3 proteins connected are shown. Each node represents a protein and the edge the PPI identified by cross-linking. Nodes are color-coded based on functional clusters shown in the combined network (Fig. 3A). Edges in red indicate protein-protein interactions (PPIs) found in both XL-MS data and in literature (high confidence in at least one database of STRING, InWEB and BioGRID). Sizes of the nodes are proportional to the protein abundances (Log2 scale). Widths of the edges are proportional to the number of unique Lys-Lys cross-links. The confidence of each cross-link is indicated as dotted and solid lines for 2% FDR and 1% FDR, respectively. All information regarding individual PPIs can be retrieved at <http://xlink.cncr.nl>. **(B)** Distribution of the fraction of direct neighbors (cross-linked proteins pairs) that are in the same cluster in the combined network (labelled in orange) and a randomly rewired network (100 iterations, labelled in light blue). **(C)** Distribution of the number of cross-links found between protein pairs present in at least one database (DB) with high confidence (labelled in red) or do not present in any of the three databases (i.e. STRING, InWEB and BioGRID, labelled in black). **(D)** Boxplot showing the distribution of protein abundances in different categories: xlink, cross-linked proteins identified in this study; public DB, protein interactions present in at least one public database with high confidence (i.e. STRING, InWEB and BioGRID). The number of proteins and median abundance are indicated in each box. Protein abundance data was obtained from (12).

**A**

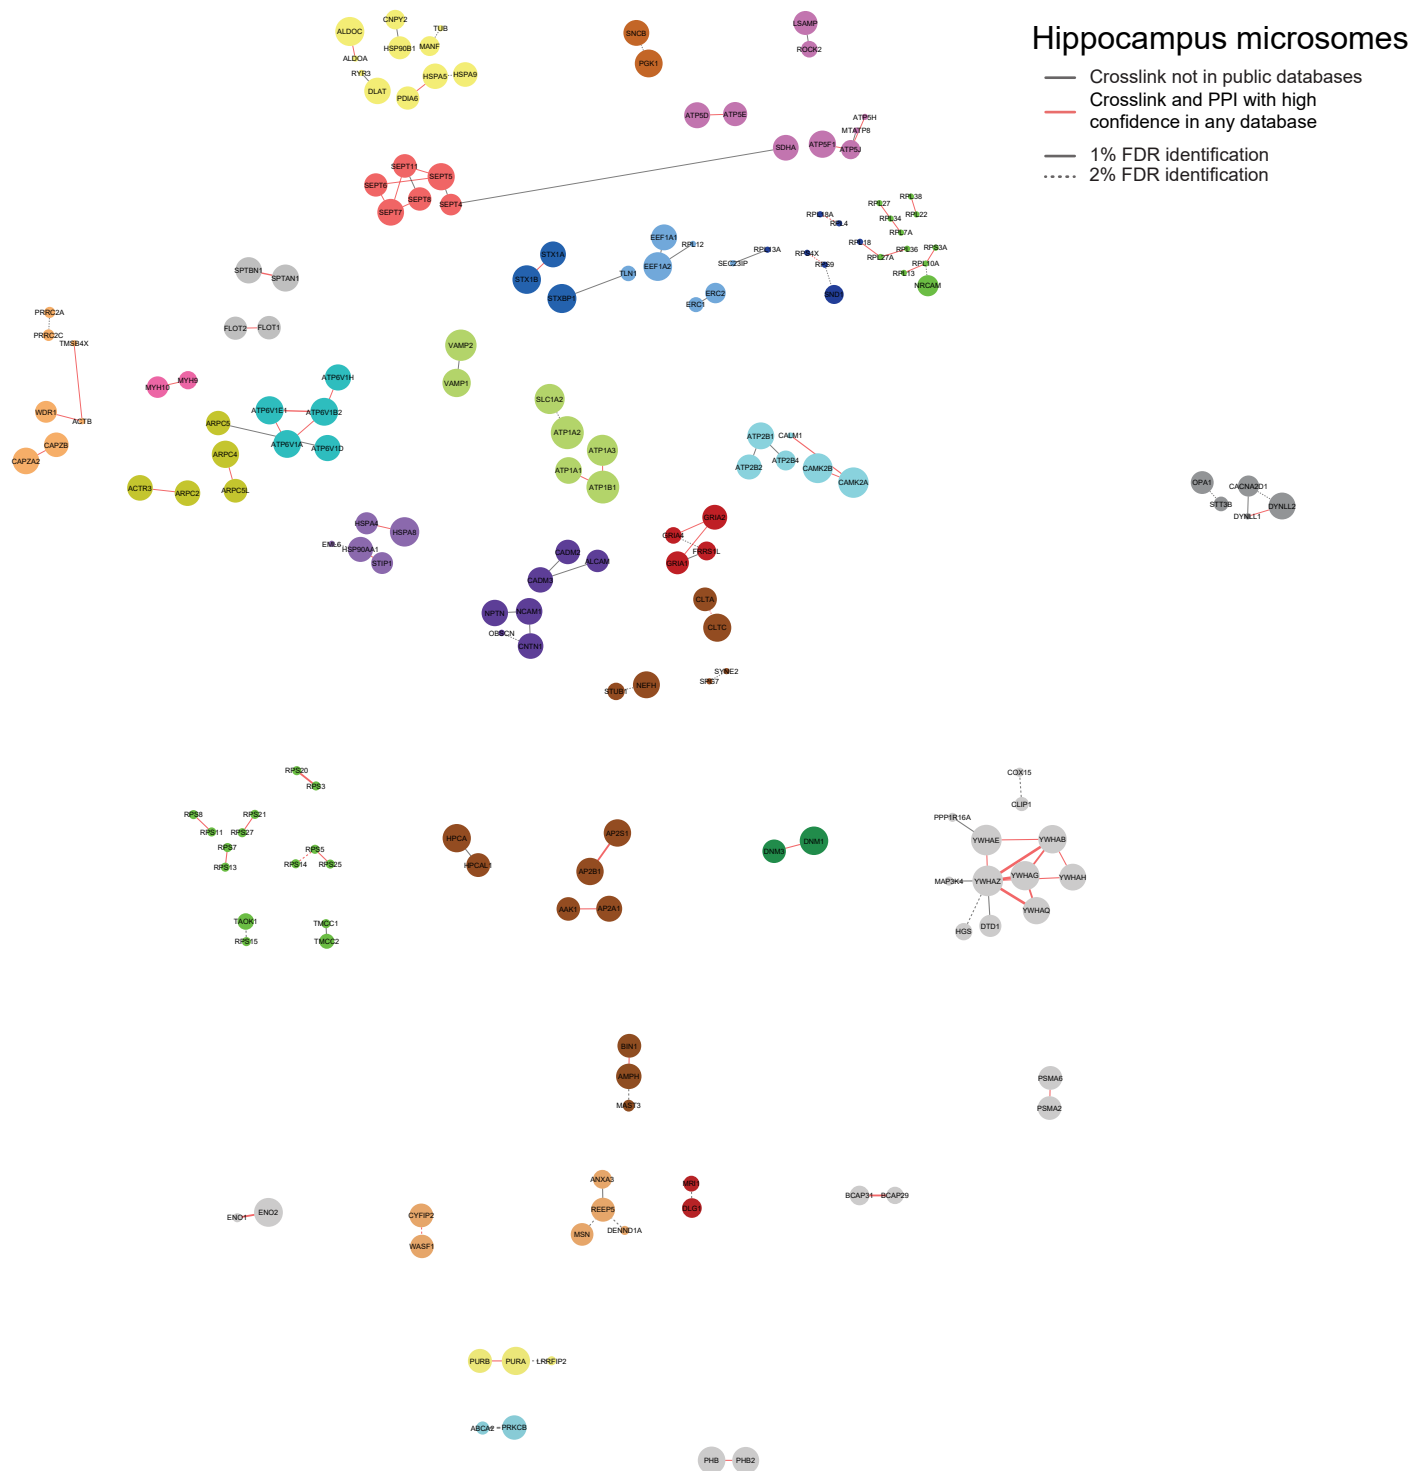

**B**

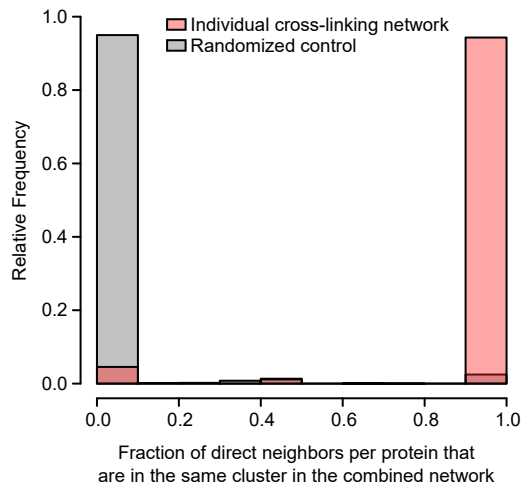

**C**

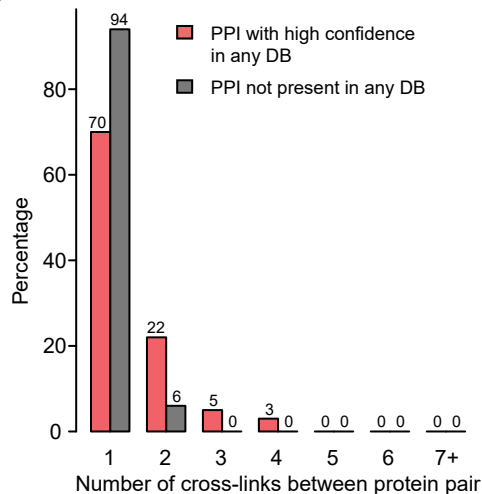

**D**

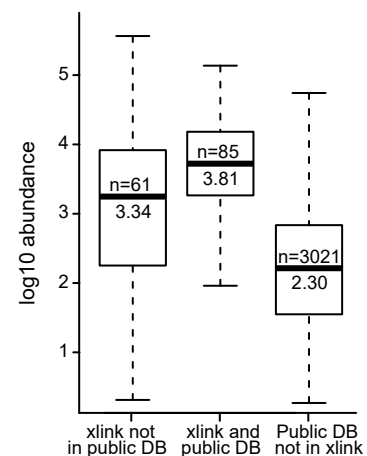

**Fig. S4. Characterization of XL-based protein interaction network from hippocampus microsomes.**

(A) Nodes represent proteins and edges show the interactions identified by a single XL-MS experiment in hippocampal microsomes (dataset 1). Protein names are included and disconnected protein modules with at least 3 proteins connected are shown. Each node represents a protein and the edge the PPI identified by cross-linking. Nodes are color-coded based on functional clusters shown in the combined network (Fig. 3A). Edges in red indicate protein-protein interactions (PPIs) found in both XL-MS data and in literature (high confidence in at least one database of STRING, InWEB and BioGRID). Sizes of the nodes are proportional to the protein abundances (Log2 scale). Widths of the edges are proportional to the number of unique Lys-Lys cross-links. The confidence of each cross-link is indicated as dotted and solid lines for 2% FDR and 1% FDR, respectively. All information regarding individual PPIs can be retrieved at <http://xlink.cncr.nl>. (B) Distribution of the fraction of direct neighbors (cross-linked proteins pairs) that are in the same cluster in the combined network (labelled in orange) and a randomly rewired network (100 iterations, labelled in light blue). (C) Distribution of the number of cross-links found between protein pairs present in at least one database (DB) with high confidence (labelled in red) or do not present in any of the three databases (i.e. STRING, InWEB and BioGRID, labelled in black). (D) Boxplot showing the distribution of protein abundances in different categories: xlink, cross-linked proteins identified in this study; public DB, protein interactions present in at least one public database with high confidence (i.e. STRING, InWEB and BioGRID). The number of proteins and median abundance are indicated in each box. Protein abundance data was obtained from (12).

**A**

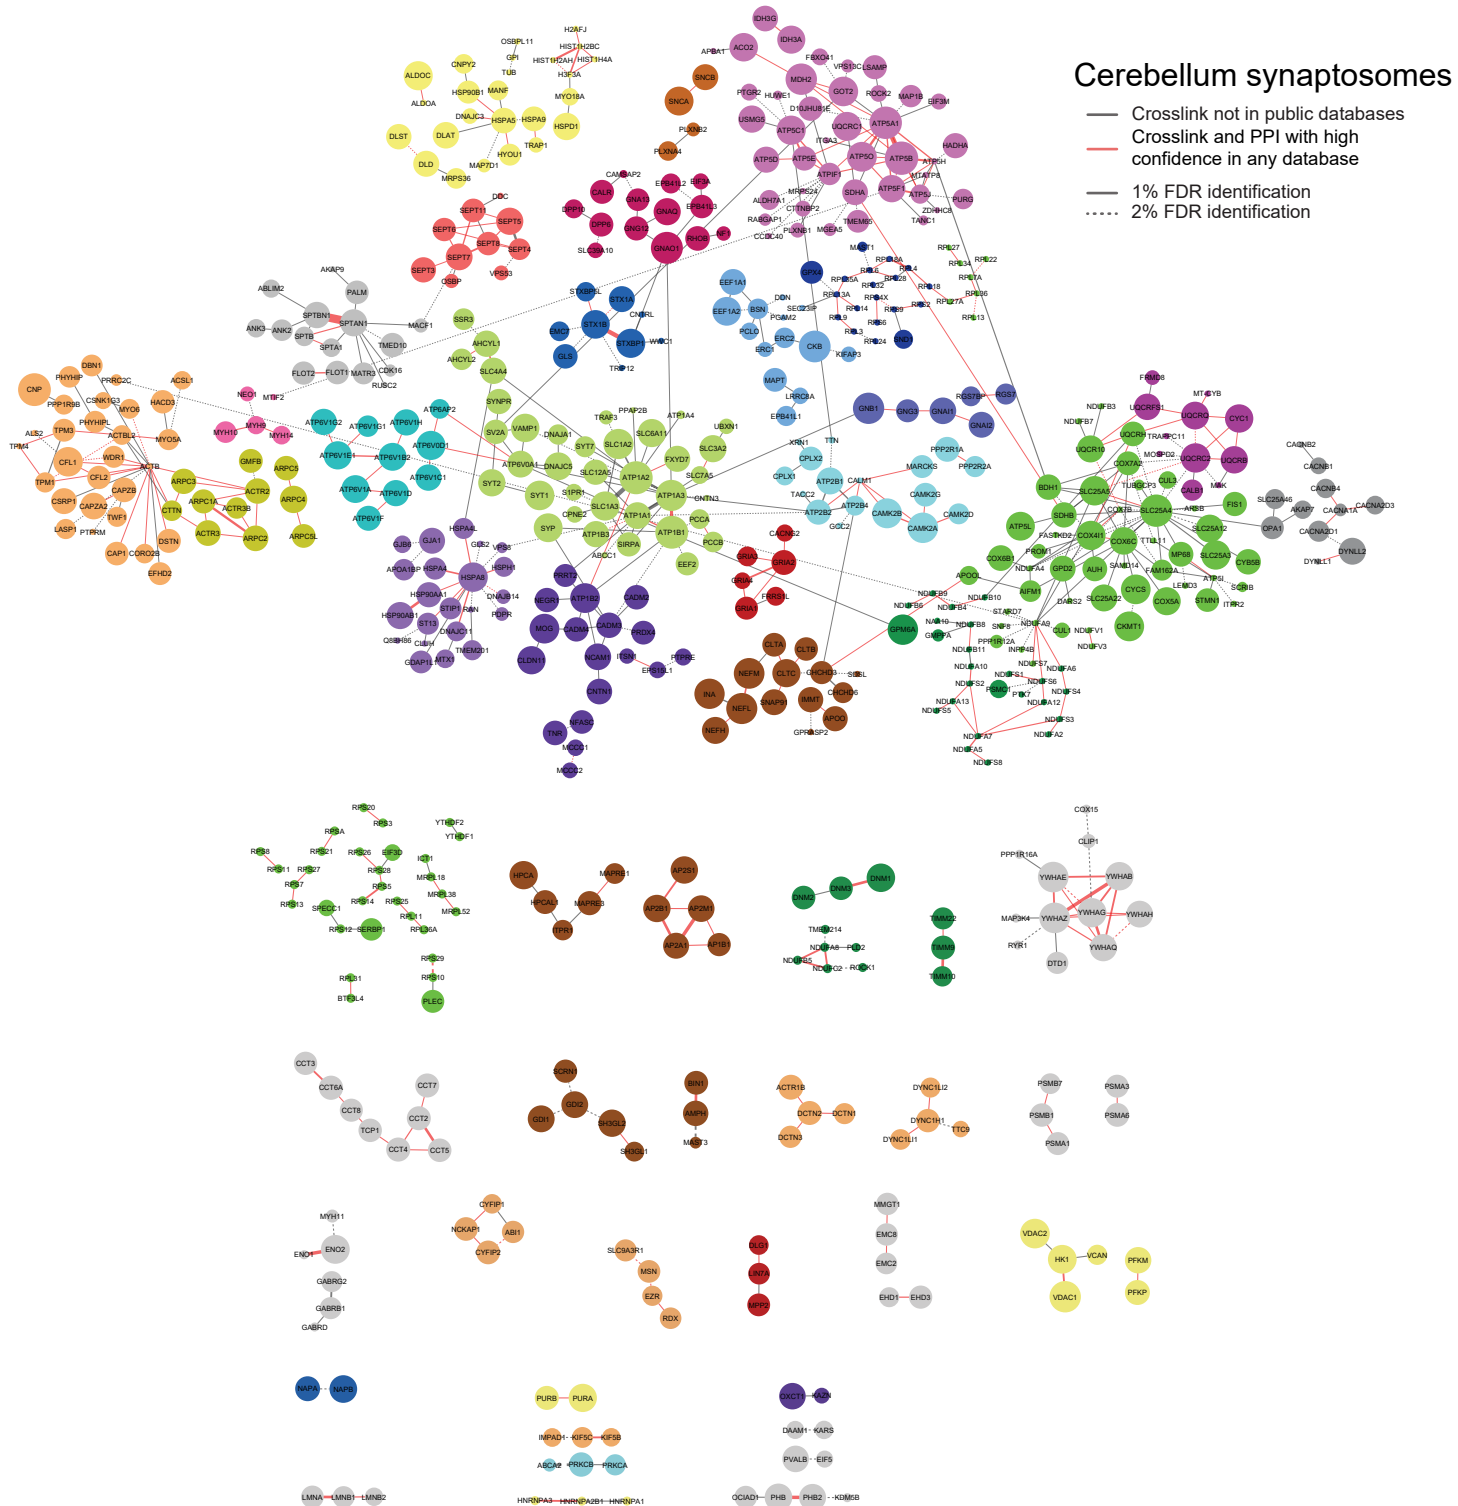

**B**

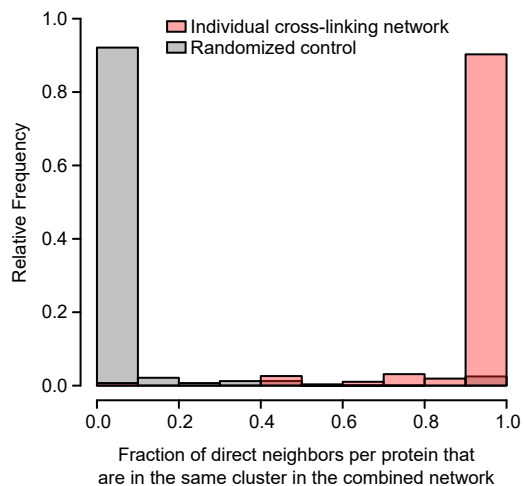

**C**

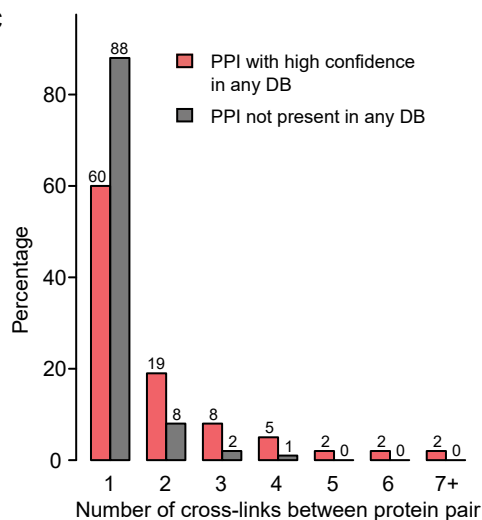

**D**

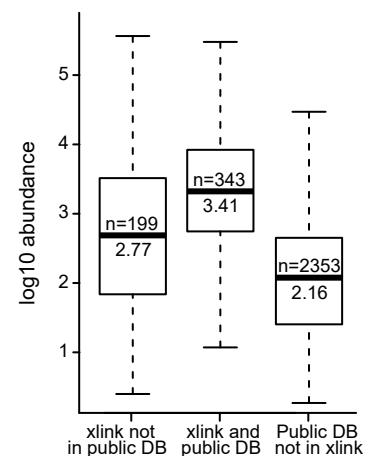

**Fig. S5. Characterization of XL-based protein interaction network from cerebellum synaptosomes.**

(A) Nodes represent proteins and edges show the interactions identified by a single XL-MS experiment in cerebellar synaptosomes (dataset 1). Protein names are included and disconnected protein modules with at least 3 proteins connected are shown. Each node represents a protein and the edge the PPI identified by cross-linking. Nodes are color-coded based on functional clusters shown in the combined network (Fig. 3A). Edges in red indicate protein-protein interactions (PPIs) found in both XL-MS data and in literature (high confidence in at least one database of STRING, InWEB and BioGRID). Sizes of the nodes are proportional to the protein abundances (Log<sub>2</sub> scale). Widths of the edges are proportional to the number of unique Lys-Lys cross-links. The confidence of each cross-link is indicated as dotted and solid lines for 2% FDR and 1% FDR, respectively. All information regarding individual PPIs can be retrieved at <http://xlink.cncr.nl>. (B) Distribution of the fraction of direct neighbors (cross-linked proteins pairs) that are in the same cluster in the combined network (labelled in orange) and a randomly rewired network (100 iterations, labelled in light blue). (C) Distribution of the number of cross-links found between protein pairs present in at least one database (DB) with high confidence (labelled in red) or do not present in any of the three databases (i.e. STRING, InWEB and BioGRID, labelled in black). (D) Boxplot showing the distribution of protein abundances in different categories: xlink, cross-linked proteins identified in this study; public DB, protein interactions present in at least one public database with high confidence (i.e. STRING, InWEB and BioGRID). The number of proteins and median abundance are indicated in each box. Protein abundance data was obtained from (12).

**A**

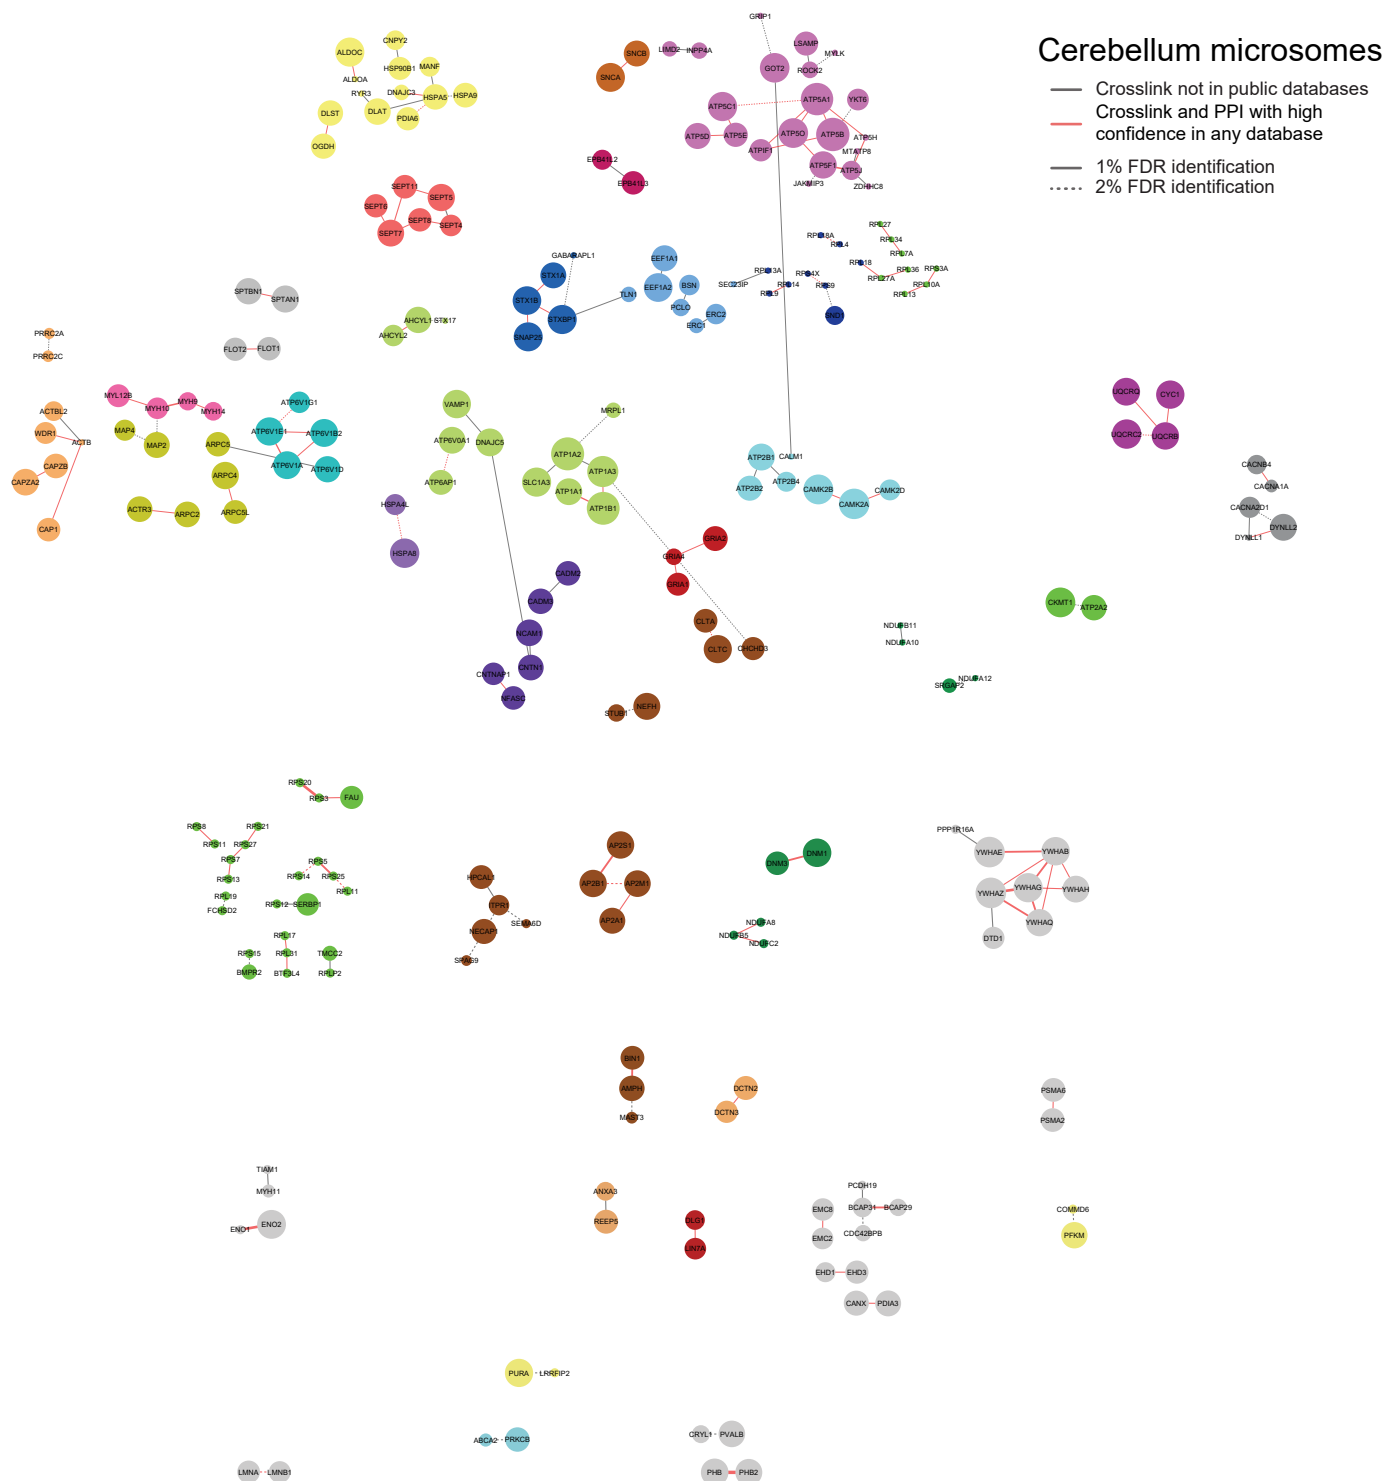

**B**

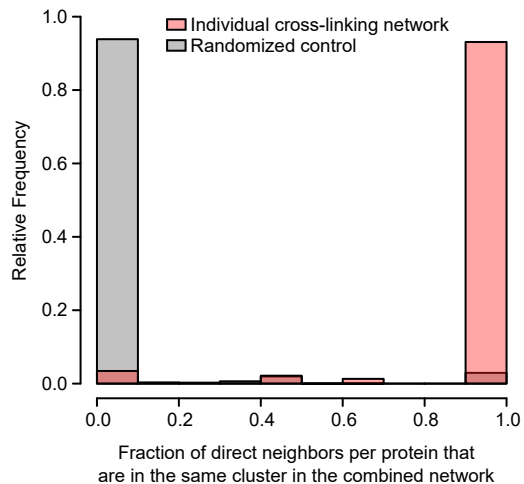

**C**

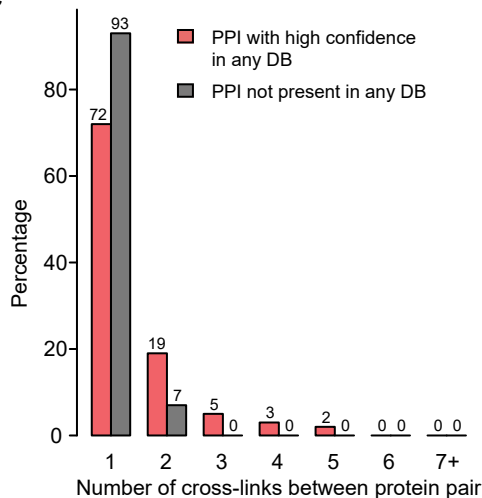

**D**

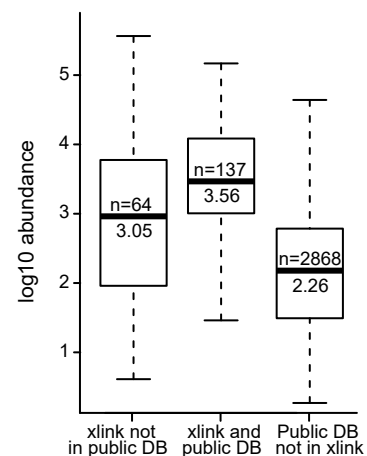



**Fig. S6. Characterization of XL-based protein interaction network from cerebellum microsomes.**

(A) Nodes represent proteins and edges show the interactions identified by a single XL-MS experiment in cerebellar microsomes (dataset 1). Protein names are included and disconnected protein modules with at least 3 proteins connected are shown. Each node represents a protein and the edge the PPI identified by cross-linking. Nodes are color-coded based on functional clusters shown in the combined network (Fig. 3A). Edges in red indicate protein-protein interactions (PPIs) found in both XL-MS data and in literature (high confidence in at least one database of STRING, InWEB and BioGRID). Sizes of the nodes are proportional to the protein abundances (Log2 scale). Widths of the edges are proportional to the number of unique Lys-Lys cross-links. The confidence of each cross-link is indicated as dotted and solid lines for 2% FDR and 1% FDR, respectively. All information regarding individual PPIs can be retrieved at <http://xlink.cncr.nl>. (B) Distribution of the fraction of direct neighbors (cross-linked proteins pairs) that are in the same cluster in the combined network (labelled in orange) and a randomly rewired network (100 iterations, labelled in light blue). (C) Distribution of the number of cross-links found between protein pairs present in at least one database (DB) with high confidence (labelled in red) or do not present in any of the three databases (i.e. STRING, InWEB and BioGRID, labelled in black). (D) Boxplot showing the distribution of protein abundances in different categories: xlink, cross-linked proteins identified in this study; public DB, protein interactions present in at least one public database with high confidence (i.e. STRING, InWEB and BioGRID). The number of proteins and median abundance are indicated in each box. Protein abundance data was obtained from (12).

— Cross-link not in public databases  
 — Cross-link and PPI with high confidence in any database  
 — 1% FDR identification  
 - - - 2% FDR identification

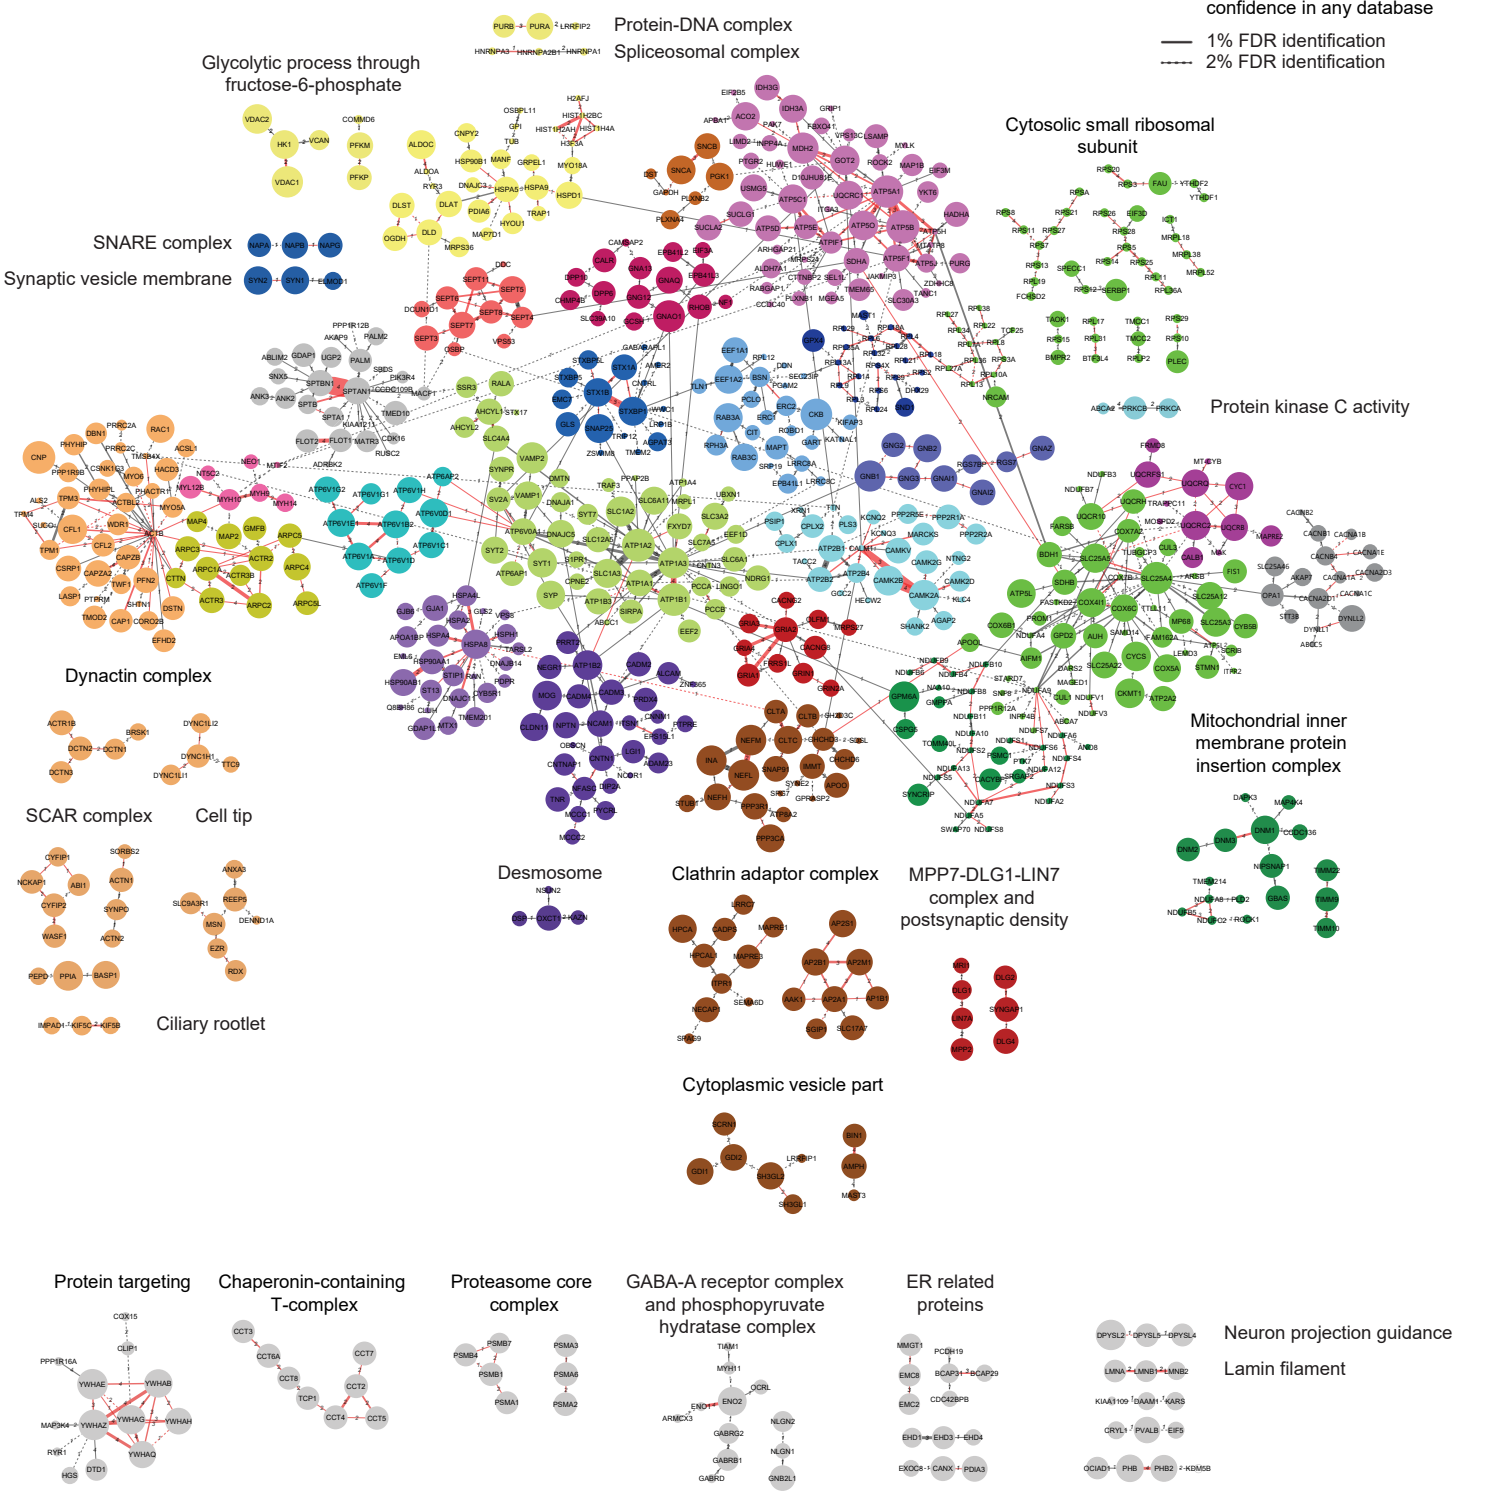

**Fig. S7. Extended and detailed XL-based protein interaction network (extended Fig. 3A).** Nodes represent proteins and edges show the interactions identified by XL-MS (dataset 1). Protein names are included and disconnected protein modules with at least 3 proteins connected are shown. Each node represents a protein and the edge the PPI identified by cross-linking. Nodes are color-coded based on functional clusters generated by unsupervised edge-betweenness clustering for the core component or gene functional classification for the disconnected modules, and annotated by GO enrichment analysis. Disconnected modules were located next to the functionally closest cluster of the core component of the network. Edges in red indicate protein-protein interactions (PPIs) found in both XL-MS data and in literature (high confidence in at least one database of STRING, InWEB and BioGRID). Sizes of the nodes are proportional to the protein abundances (Log2 scale). Widths of the edges are proportional to the number of unique Lys-Lys cross-links. The confidence of each cross-link is indicated as dotted and solid lines for 2% FDR and 1% FDR, respectively. Edges are labeled according to the number of samples in which the PPI was identified. All information regarding individual PPIs can be retrieved at <http://xlink.cncr.nl>.

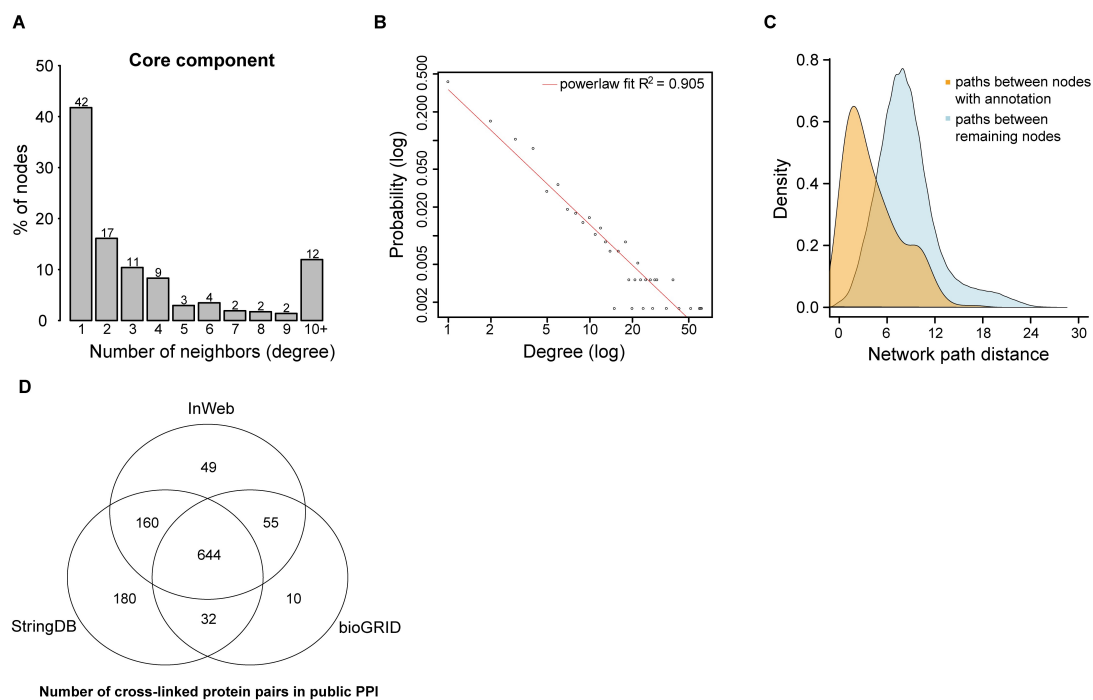

**Fig. S8. XL-based protein interaction network analysis.** (A) Degree distribution of the XL-based protein interaction network (Fig. 3A). (B) Power law log-log plot of the network. X-axis represents the degree of a node (number of edges) and y-axis represents the probability that a node with a given degree exists in the network. (C) Density plot of the path lengths between the proteins annotated with the same GO term and between all non-annotated nodes in the core component of the network. (D) Number of cross-linked protein pairs found in at least one of the public PPI databases (i.e., StringDB, InWEB and BrioGRID) with any confidence level.

**A**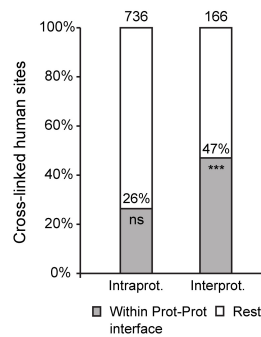**B****Independent replicate 1**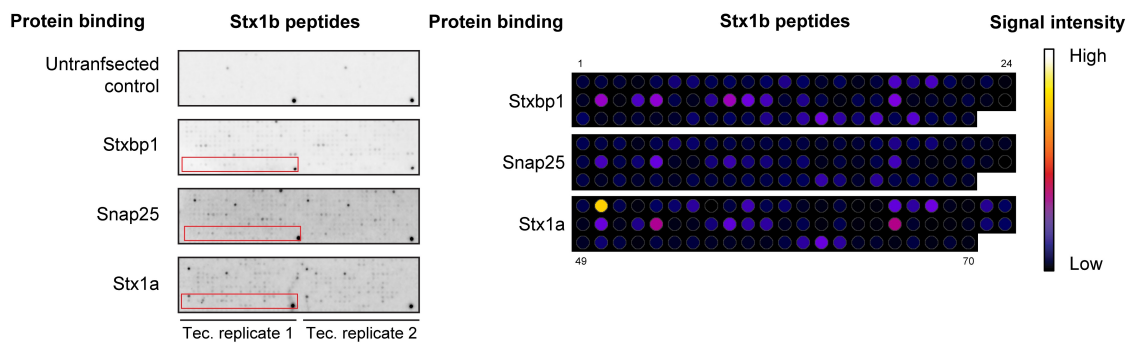**Independent replicate 2**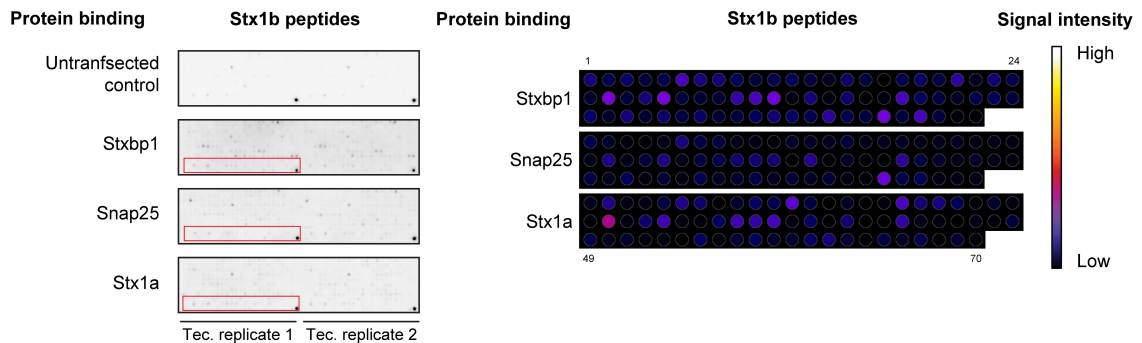

**Fig. S9. Protein interaction interfaces and peptide array analysis (extended Fig. 4).** (A) Percentage and total number of cross-linked lysines within and beyond the protein-protein interaction interfaces predicted by InteractomeINSIDER for the human proteome (Table S3). Fisher exact test showed a significant enrichment for interprotein cross-links within the interaction interfaces (\*\*\*)  $<0.00001$ , but not for intraprotein cross-links (ns, 0.79). (B) The signal intensity detected by immunoblotting for each peptide spot (red squares) was processed by Protein Array Analyzer of ImageJ. Two independent replicates and two technical replicates were performed for each protein tested. Peptide sequences are presented in Table S4.

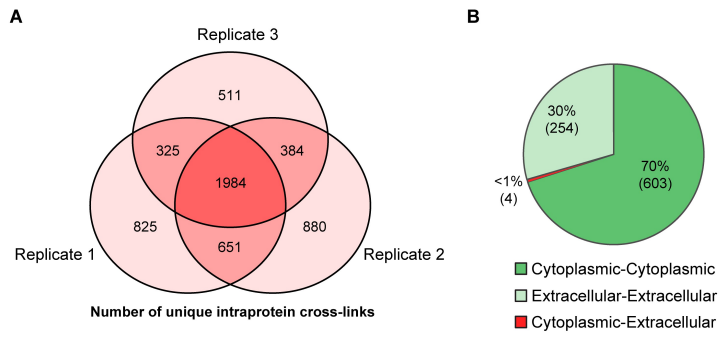

**Fig. S10. Evaluation of XL-MS approach on biologically independent replicates for hippocampal synaptosome (extended Fig. 6).** (A) Venn diagram showing the number of identified intraprotein cross-links over the different replicates. (B) Pie chart showing the number of cross-links identified between cytoplasmic and extra-cellular regions of proteins (dataset 2).

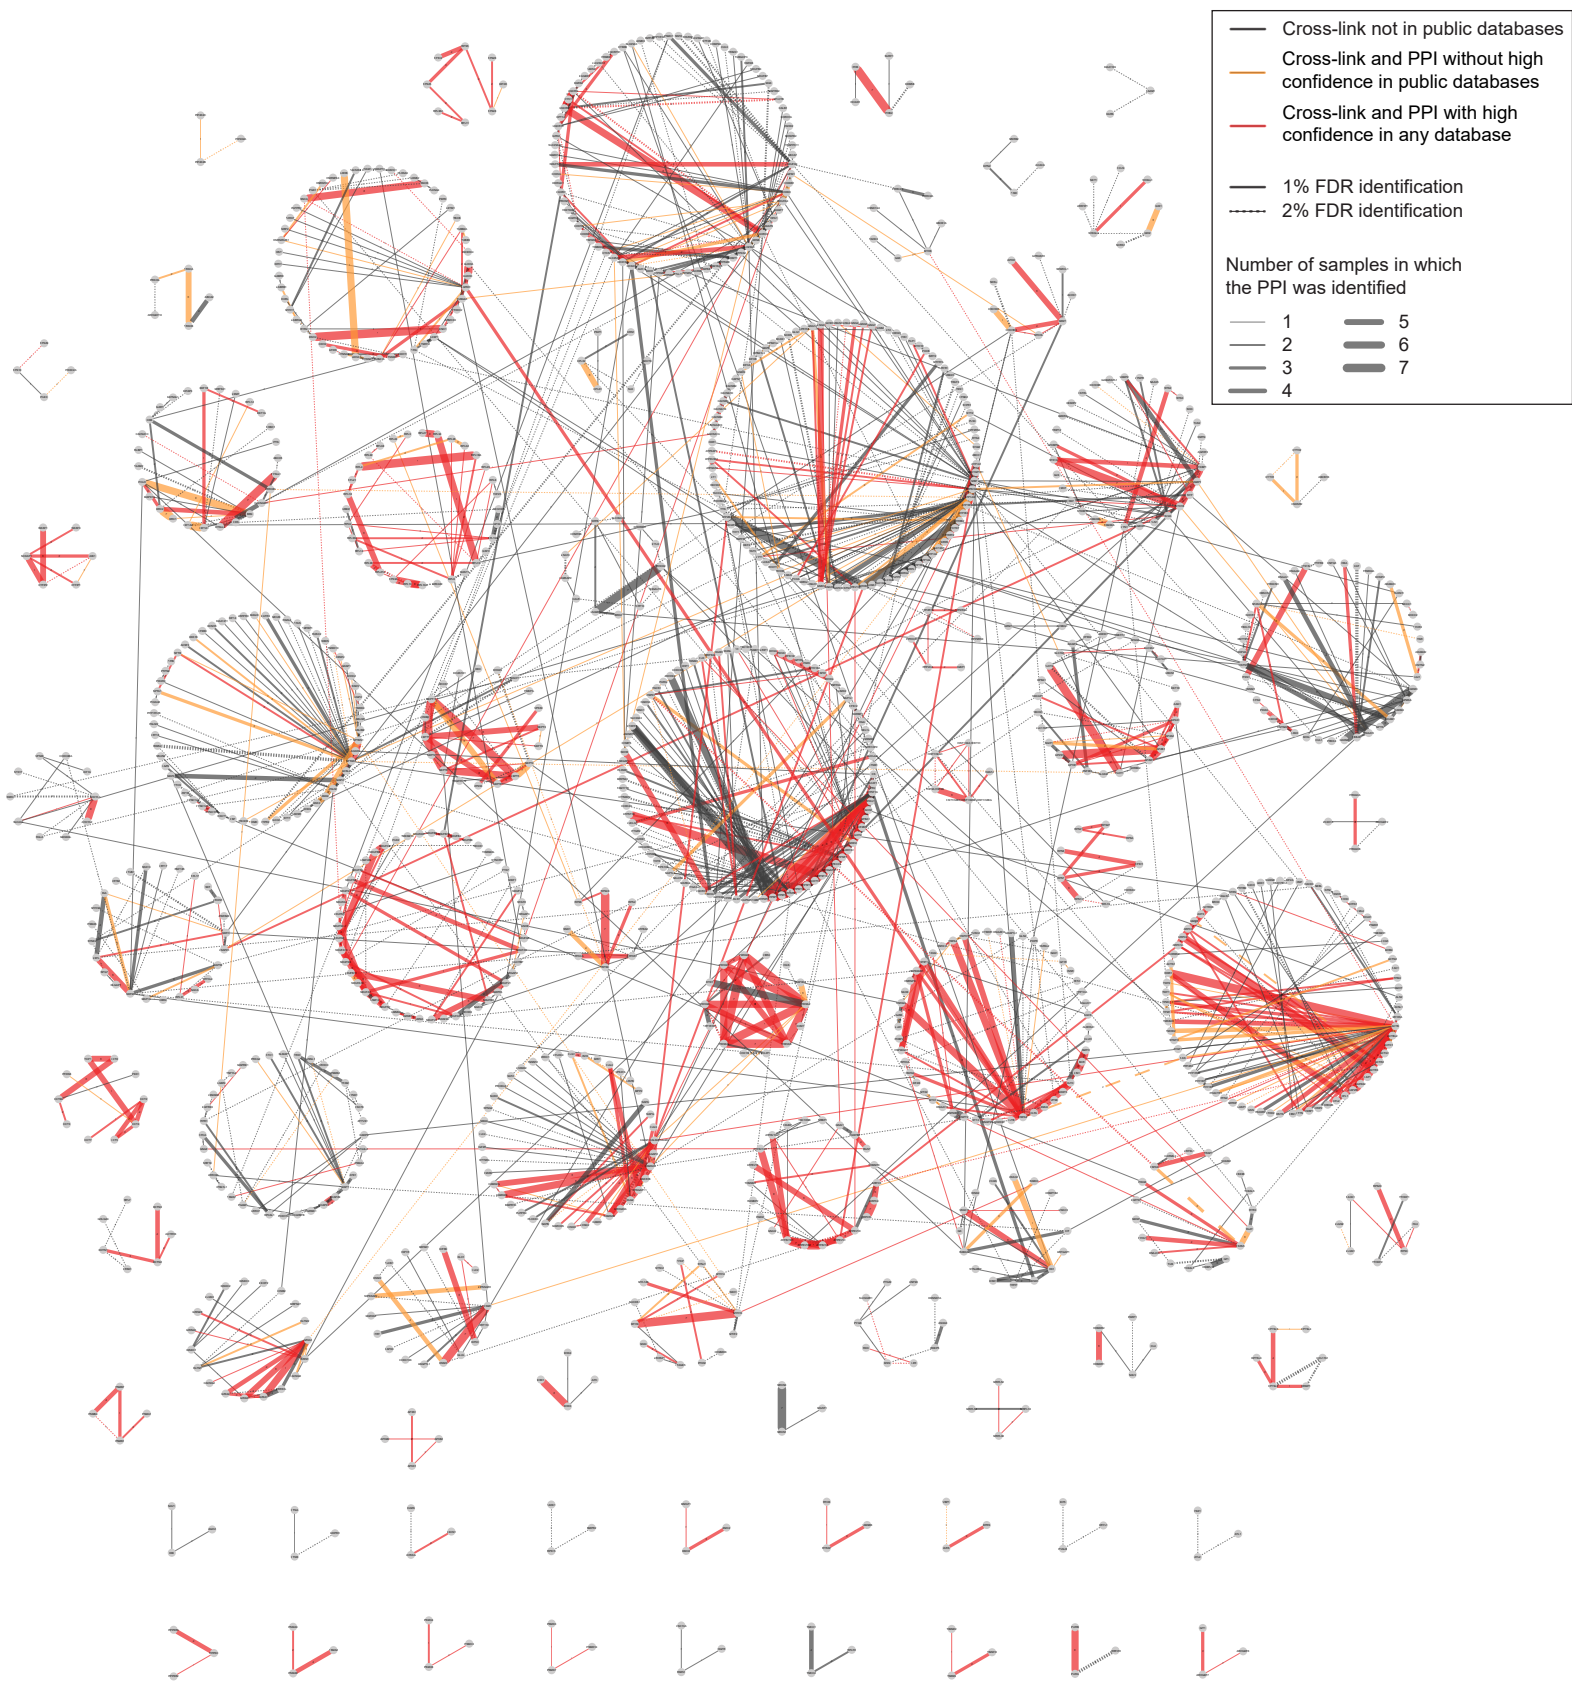



**Fig. S11. Complete XL-based protein interaction network from all seven cross-linking MS experiments.** Nodes represent proteins and edges show the interactions identified by XL-MS (dataset 1 and 2). Disconnected protein modules with at least 3 proteins connected are shown. Nodes layout is based on unsupervised edge-betweenness clustering. Edges in red and orange indicate protein-protein interactions (PPIs) reported in literature (STRING, InWEB and BioGRID) classified with and without high confidence in at least one database, respectively. Labels and widths of the edges indicate the number of samples in which the PPI was identified. The confidence of each cross-link is indicated as dotted and solid lines for 2% FDR and 1% FDR, respectively. All information regarding individual PPIs can be retrieved at <http://xlink.cncr.nl>.
